# Supplementary material for: Medication-taking for secondary prevention of acute myocardial infarction: a thematic meta-synthesis of patient experiences
Source: HighWire-hosted journal article supplement (doi:10.1136/openhrt-2021-001939), 2022-03-01
Supplement: openhrt-2021-001939supp001_data_supplement.pdf [file openhrt-2021-001939supp001_data_supplement.pdf]

## Supplementary Materials

### **Supplement A: Collated Systematic Search Results and Title/ Abstract Screened Selections** **6/7/21**

| <u>Inclusion Criteria</u>                                                    |
|------------------------------------------------------------------------------|
| Myocardial infarction patient.                                               |
| Published between 2000 and 2021.                                             |
| Examines patient experience, perspective, requirements of medication taking. |
| Original qualitative data.                                                   |
| Available in English.                                                        |

#### 1) PubMed Search

All fields, no restrictions

| <u>Search</u> | <u>Search Terms</u>                                                                                                                                                                                                                                        | <u>No. of Results</u>       |                             |                            |
|---------------|------------------------------------------------------------------------------------------------------------------------------------------------------------------------------------------------------------------------------------------------------------|-----------------------------|-----------------------------|----------------------------|
|               |                                                                                                                                                                                                                                                            | <u>HP</u><br><u>22/3/21</u> | <u>AR</u><br><u>21/6/21</u> | <u>HP</u><br><u>6/7/21</u> |
| 1             | "Qualitative research"[MeSH] OR "qualitative research" OR qualitative OR "phenomeno*" OR "experience" OR "content analysis" OR "thematic analysis" OR "grounded theory" OR "ethnography" OR "interview" OR "discourse analysis" OR "conversation analysis" | 1,352,167                   | 1,376,309                   | 1,383,551                  |
| 2             | "myocardial infarction"[MeSH] OR "myocardial infarction" OR "heart attack" OR "AMI"                                                                                                                                                                        | 265,309                     | 267,960                     | 268,812                    |
| 3             | "medication adherence"[MeSH] OR "medication adherence" OR "medication compliance" OR "medication concordance" OR "medicine adherence" OR "medicine compliance"                                                                                             | 29,513                      | 30,163                      | 30,367                     |
| 4             | #1 AND #2 AND #3                                                                                                                                                                                                                                           | 52                          | 53                          | 53                         |

[South Asians living in the UK and adherence to coronary heart disease medication: a mixed- method study.](#)

Jalal Z, Antoniou S, Taylor D, Paudyal V, Finlay K, Smith F. Int J Clin Pharm. 2019 Feb;41(1):122-130. doi: 10.1007/s11096-018-0760-3. Epub 2018 Dec 18.

[Perspectives of Patients and Professionals on Information and Education After Myocardial Infarction With Insight for Mixed Reality Implementation: Cross-Sectional Interview Study.](#)

Hilt AD, Mamaqi Kapllani K, Hierck BP, Kemp AC, Albayrak A, Melles M, Schaliij MJ, Scherptong RWC. *JMIR Hum Factors*. 2020 Jun 23;7(2):e17147. doi: 10.2196/17147.

[Drug compliance after stroke and myocardial infarction: a comparative study.](#)

Arif H, Aijaz B, Islam M, Aftab U, Kumar S, Shafqat S. *Neurol India*. 2007 Apr-Jun;55(2):130-5. doi: 10.4103/0028-3886.32783.

[Clinician-patient discord: exploring differences in perspectives for discontinuing clopidogrel.](#)

Garavalia L, Ho PM, Garavalia B, Foody JM, Kruse H, Spertus JA, Decker C. *Eur J Cardiovasc Nurs*. 2011 Mar;10(1):50-5. doi: 10.1016/j.ejcnurse.2010.04.002. Epub 2010 May 21.

[Exploring patients' reasons for discontinuance of heart medications.](#)

Garavalia L, Garavalia B, Spertus JA, Decker C. *J Cardiovasc Nurs*. 2009 Sep-Oct;24(5):371-9. doi: 10.1097/JCN.0b013e3181ae7b2a.

## 2) SCOPUS Search

TITLE-ABS-KEY, no restrictions

| Search | Search Terms                                                                                                                                                                                                               | No. of Results |               |              |
|--------|----------------------------------------------------------------------------------------------------------------------------------------------------------------------------------------------------------------------------|----------------|---------------|--------------|
|        |                                                                                                                                                                                                                            | HP<br>24/3/21  | AR<br>21/6/21 | HP<br>6/7/21 |
| 5      | "qualitative research" OR qualitative OR "phenomeno*" OR "experience" OR "content analysis" OR "thematic analysis" OR "grounded theory" OR "ethnography" OR "interview" OR "discourse analysis" OR "conversation analysis" | 4,796,317      | 4,884,827     | 4,913,231    |
| 6      | "myocardial infarction" OR "heart attack" OR "AMI"                                                                                                                                                                         | 302,173        | 305,752       | 306,578      |
| Z      | "medication adherence" OR "medication compliance" OR "medication concordance" OR "medicine adherence" OR "medicine compliance"                                                                                             | 43,929         | 45,123        | 45,422       |
| 8      | #5 AND #6 AND #7                                                                                                                                                                                                           | 101            | 105           | 106          |

Perspectives of patients and professionals on information and education after myocardial infarction with insight for mixed reality implementation: Cross-sectional interview study

Hilt, A.D., Kapllani, K.M., Hierck, B.P., (...), Schalijs, M.J., Scherptong, R.W.C. 2020 JMIR Human Factors 7(2),e17147

South Asians living in the UK and adherence to coronary heart disease medication: a mixed-method study

Jalal, Z., Antoniou, S., Taylor, D., (...), Finlay, K., Smith, F. 2019 International Journal of Clinical Pharmacy 41(1), pp. 122-130

Identifying determinants of medication adherence following myocardial infarction using the Theoretical Domains Framework and the Health Action Process Approach

Presseau, J., Schwalm, J.D., Grimshaw, J.M., (...), Sullivan, K., Ivers, N.M. 2017 Psychology and Health 32(10), pp. 1176-1194

Clinician-patient discord: Exploring differences in perspectives for discontinuing clopidogrel

Garavalia, L., Ho, P.M., Garavalia, B., (...), Spertus, J.A., Decker, C. 2011 European Journal of Cardiovascular Nursing 10(1), pp. 50-55

Impact of community pharmacist intervention discussing patients' beliefs to improve medication adherence

Gujral, G., Winckel, K., Nissen, L.M., Cottrell, W.N. 2014 International Journal of Clinical Pharmacy 36(5), pp. 1048-1058

Exploring patients' reasons for discontinuance of heart medications

Garavalia, L., Garavalia, B., Spertus, J.A., Decker, C. 2009 Journal of Cardiovascular Nursing 24(5), pp. 371-379

Drug compliance after stroke and myocardial infarction: A comparative study

Arif, H., Aijaz, B., Islam, M., (...), Kumar, S., Shafqat, S. 2007 Neurology India 55(2), pp. 130-135

### 3) PsycInfo

Keywords, no restrictions

| <u>Search</u> | <u>Search Terms</u>                                                                                                                                                                                                        | <u>No. of Results</u>       |                             |                            |
|---------------|----------------------------------------------------------------------------------------------------------------------------------------------------------------------------------------------------------------------------|-----------------------------|-----------------------------|----------------------------|
|               |                                                                                                                                                                                                                            | <u>HP</u><br><u>24/3/21</u> | <u>AR</u><br><u>21/6/21</u> | <u>HP</u><br><u>6/7/21</u> |
| <u>9</u>      | "qualitative research" OR qualitative OR "phenomeno*" OR "experience" OR "content analysis" OR "thematic analysis" OR "grounded theory" OR "ethnography" OR "interview" OR "discourse analysis" OR "conversation analysis" | 839,782                     | 853,278                     | 856,671                    |
| <u>10</u>     | "myocardial infarction" OR "heart attack" OR "AMI"                                                                                                                                                                         | 6,161                       | 6,209                       | 6,221                      |
| <u>11</u>     | "medication adherence" OR "medication compliance" OR "medication concordance" OR "medicine adherence" OR "medicine compliance"                                                                                             | 7,678                       | 7,803                       | 7,829                      |
| <u>12</u>     | #9 AND #10 AND #11                                                                                                                                                                                                         | 12                          | 12                          | 13                         |

Impact of community pharmacist intervention discussing patients' beliefs to improve medication adherence

G Gujral, K Winckel, LM Nissen, WN Cottrell

International journal of clinical pharmacy, 2014, 36(5), 1048-1058 | added to CENTRAL: 31 December 2014 | 2014 Issue 12

South Asians living in the UK and adherence to coronary heart disease medication: a mixed-method study

Z Jalal, S Antoniou, D Taylor, V Paudyal, K Finlay, F Smith

International journal of clinical pharmacy, 2019, 41(1), 122-130 | added to CENTRAL: 31 March 2019 | 2019 Issue 3

**4) Cochrane Library**

TITLE-ABS-KEY, no restrictions

| <u>Search</u> | <u>Search Terms</u> | <u>No. of Results</u>       |                             |                            |
|---------------|---------------------|-----------------------------|-----------------------------|----------------------------|
|               |                     | <u>HP</u><br><u>24/3/21</u> | <u>AR</u><br><u>21/6/21</u> | <u>HP</u><br><u>6/7/21</u> |
|               |                     |                             |                             |                            |

|    |                                                                                                                                                                                                                            |         |         |        |
|----|----------------------------------------------------------------------------------------------------------------------------------------------------------------------------------------------------------------------------|---------|---------|--------|
| 13 | "qualitative research" OR qualitative OR "phenomeno*" OR "experience" OR "content analysis" OR "thematic analysis" OR "grounded theory" OR "ethnography" OR "interview" OR "discourse analysis" OR "conversation analysis" | 151,717 | 156,830 | 88,995 |
| 14 | <u>"myocardial infarction" OR "heart attack" OR "AMI"</u>                                                                                                                                                                  | 33,047  | 33,208  | 33,706 |
| 15 | "medication adherence" OR "medication compliance" OR "medication concordance" OR "medicine adherence" OR "medicine compliance"                                                                                             | 8,471   | 8,649   | 8,767  |
| 16 | #13 AND #14 AND #15                                                                                                                                                                                                        | 49      | 50      | 59     |

Impact of community pharmacist intervention discussing patients' beliefs to improve medication adherence

G Gujral, K Winckel, LM Nissen, WN Cottrell

International journal of clinical pharmacy, 2014, 36(5), 1048-1058 | added to CENTRAL: 31 December 2014 | 2014 Issue 12

South Asians living in the UK and adherence to coronary heart disease medication: a mixed-method study

Z Jalal, S Antoniou, D Taylor, V Paudyal, K Finlay, F Smith

International journal of clinical pharmacy, 2019, 41(1), 122-130 | added to CENTRAL: 31 March 2019 | 2019 Issue 3

## **5) Web Of Science**

All databases, keywords, no restrictions

| <u>Search</u> | <u>Search Terms</u>                                                                                                                                                                                                        | <u>No. of Results</u>       |                             |                            |                            |
|---------------|----------------------------------------------------------------------------------------------------------------------------------------------------------------------------------------------------------------------------|-----------------------------|-----------------------------|----------------------------|----------------------------|
|               |                                                                                                                                                                                                                            | <u>HP</u><br><u>24/3/21</u> | <u>AR</u><br><u>21/6/21</u> | <u>HP</u><br><u>6/7/21</u> | <u>HP</u><br><u>5/8/21</u> |
| 17            | "qualitative research" OR qualitative OR "phenomeno*" OR "experience" OR "content analysis" OR "thematic analysis" OR "grounded theory" OR "ethnography" OR "interview" OR "discourse analysis" OR "conversation analysis" | 4,401,035                   | 206,505                     | 4,541,098                  | 4,586,701                  |

|           |                                                                                                                                |         |        |         |         |
|-----------|--------------------------------------------------------------------------------------------------------------------------------|---------|--------|---------|---------|
| <u>18</u> | "myocardial infarction" OR "heart attack" OR "AMI"                                                                             | 521,851 | 55,436 | 528,393 | 530,271 |
| <u>19</u> | "medication adherence" OR "medication compliance" OR "medication concordance" OR "medicine adherence" OR "medicine compliance" | 38,780  | 5,177  | 39,932  | 40,275  |
| <u>20</u> | #17 AND #18 AND #19                                                                                                            | 135     | 1      | 137     | 138     |

### Core collection

| <u>Sea</u><br><u>rch</u> | <u>Search Terms</u>                                                                                                                                                                                                        | <u>HP 5/8/21</u> |
|--------------------------|----------------------------------------------------------------------------------------------------------------------------------------------------------------------------------------------------------------------------|------------------|
| <u>17</u>                | "qualitative research" OR qualitative OR "phenomeno*" OR "experience" OR "content analysis" OR "thematic analysis" OR "grounded theory" OR "ethnography" OR "interview" OR "discourse analysis" OR "conversation analysis" | 2,683,000        |
| <u>18</u>                | "myocardial infarction" OR "heart attack" OR "AMI"                                                                                                                                                                         | 325,065          |
| <u>19</u>                | "medication adherence" OR "medication compliance" OR "medication concordance" OR "medicine adherence" OR "medicine compliance"                                                                                             | 21,353           |
| <u>20</u>                | #17 AND #18 AND #19                                                                                                                                                                                                        | 85               |

### (All databases) HP's results:

Perspectives of Patients and Professionals on Information and Education After Myocardial Infarction With Insight for Mixed Reality Implementation: Cross-Sectional Interview Study.

By: Hilt, Alexander D; Mamaqi Kapllani, Kevin; Hierck, Beerend P; et al.

JMIR human factors Volume: 7 Issue: 2 Pages: e17147 Published: 2020 Jun 23

"It's up to me with a little support" - Adherence after myocardial infarction: A qualitative study

By: Hanna, Admi; Yael, Eilon-Moshe; Hadassa, Levy; et al.

INTERNATIONAL JOURNAL OF NURSING STUDIES Volume: 101 Article Number: 103416

Published: JAN 2020

South Asians living in the UK and adherence to coronary heart disease medication: a mixed-method study

By: Jalal, Zahraa; Antoniou, Sotiris; Taylor, David; et al.

INTERNATIONAL JOURNAL OF CLINICAL PHARMACY Volume: 41 Issue: 1 Pages: 122-130 Published: FEB 2019

Clinician-patient discord: Exploring differences in perspectives for discontinuing clopidogrel

By: Garavalia, Linda; Ho, P. Michael; Garavalia, Brian; et al.

EUROPEAN JOURNAL OF CARDIOVASCULAR NURSING Volume: 10 Issue: 1 Pages: 50-55 Published: MAR 2011

Exploring Patients' Reasons for Discontinuance of Heart Medications

By: Garavalia, Linda; Garavalia, Brian; Spertus, John A.; et al.

JOURNAL OF CARDIOVASCULAR NURSING Volume: 24 Issue: 5 Pages: 371-379  
Published: SEP-OCT 2009

Drug compliance after stroke and myocardial infarction: A comparative study

By: Arif, Hiba; Aijaz, Bilal; Islam, Muhammad; et al.

NEUROLOGY INDIA Volume: 55 Issue: 2 Pages: 130-135 Published: APR-JUN 2007

**Full-Read Selected Results Summary**

(Duplicates removed)

A) Perspectives of Patients and Professionals on Information and Education After Myocardial Infarction With Insight for Mixed Reality Implementation: Cross-Sectional Interview Study.

By: Hilt, Alexander D; Mamaqi Kapllani, Kevin; Hierck, Beerend P; et al.

JMIR human factors Volume: 7 Issue: 2 Pages: e17147 Published: 2020 Jun 23

<https://doi.org/10.2196/17147>

B) "It's up to me with a little support" - Adherence after myocardial infarction: A qualitative study

By: Hanna, Admi; Yael, Eilon-Moshe; Hadassa, Levy; et al.

INTERNATIONAL JOURNAL OF NURSING STUDIES Volume: 101 Article Number: 103416  
Published: JAN 2020

<https://doi.org/10.1016/j.ijnurstu.2019.103416>

C) South Asians living in the UK and adherence to coronary heart disease medication: a mixed-method study

By: Jalal, Zahraa; Antoniou, Sotiris; Taylor, David; et al.

INTERNATIONAL JOURNAL OF CLINICAL PHARMACY Volume: 41 Issue: 1 Pages: 122-130  
Published: FEB 2019

<https://doi.org/10.1007/s11096-018-0760-3>

D) Clinician-patient discord: Exploring differences in perspectives for discontinuing clopidogrel

By: Garavalia, Linda; Ho, P. Michael; Garavalia, Brian; et al.

EUROPEAN JOURNAL OF CARDIOVASCULAR NURSING Volume: 10 Issue: 1 Pages: 50-55  
Published: MAR 2011

<https://doi.org/10.1016%2Fj.ejcnurse.2010.04.002>

E) Exploring Patients' Reasons for Discontinuance of Heart Medications

By: Garavalia, Linda; Garavalia, Brian; Spertus, John A.; et al.

JOURNAL OF CARDIOVASCULAR NURSING Volume: 24 Issue: 5 Pages: 371-379  
Published: SEP-OCT 2009

<https://dx.doi.org/10.1097%2FJCN.0bo13e3181ae7b2a>

F) Drug compliance after stroke and myocardial infarction: A comparative study

By: Arif, Hiba; Aijaz, Bilal; Islam, Muhammad; et al.

NEUROLOGY INDIA Volume: 55 Issue: 2 Pages: 130-135 Published: APR-JUN 2007

<https://doi.org/10.4103/0028-3886.32783>

G) Impact of community pharmacist intervention discussing patients' beliefs to improve medication adherence

G Gujral, K Winckel, LM Nissen, WN Cottrell

International journal of clinical pharmacy, 2014, 36(5), 1048-1058 | added to CENTRAL: 31  
December 2014 | 2014 Issue 12



<https://doi.org/10.1007/s11096-014-9993-y>

H) Identifying determinants of medication adherence following myocardial infarction using the Theoretical Domains Framework and the Health Action Process Approach. [References].

Presseau, Justin; Schwalm, J. D; Grimshaw, Jeremy M; Witteman, Holly O; Natarajan, Madhu K; Linklater, Stefanie; Sullivan, Katrina; Ivers, Noah M.

Psychology & Health. Vol.32(10), 2017, pp. 1176-1194.

<https://doi.org/10.1080/08870446.2016.1260724>

## **Part 2) Snowball Search**

### **Systematic Searching Using 'Cited By' in PubMed**

**25/3/21**

#### **A) Perspectives of Patients and Professionals on Information and Education After Myocardial Infarction With Insight for Mixed Reality Implementation: Cross-Sectional Interview Study.**

By: Hilt, Alexander D; Mamaqi Kapllani, Kevin; Hierck, Beerend P; et al.

Cited by:

Shi, W., Ghisi, G.L., Hyun, K., Zhang, L. and Gallagher, R., 2021. Patient education interventions for health behaviour change in adults diagnosed with coronary heart disease: A protocol for a systematic review and meta-analysis. *Journal of Advanced Nursing*, 77(2), pp.1043-1050.

#### **B) "It's up to me with a little support" - Adherence after myocardial infarction: A qualitative study**

By: Hanna, Admi; Yael, Eilon-Moshe; Hadassa, Levy; et al.

Cited by:

Rashid, A., 2020. Yonder: Medication adherence, Twitter, head and neck cancer, and knitting. *British Journal of General Practice*, 70(690), pp.28-28.

#### **C) South Asians living in the UK and adherence to coronary heart disease medication: a mixed- method study**

By: Jalal, Zahraa; Antoniou, Sotiris; Taylor, David; et al.

Cited by (2):

Mahmood, S., Jalal, Z., Hadi, M.A., Orooj, H. and Shah, K.U., 2020. Non-Adherence to prescribed antihypertensives in primary, secondary and tertiary healthcare settings in Islamabad, Pakistan: a cross-sectional study. *Patient preference and adherence*, 14, p.73. Association between attendance at outpatient follow-up appointments and blood pressure control among patients with hypertension

Mahmood, S., Jalal, Z., Hadi, M.A. and Shah, K.U., 2020. Association between attendance at outpatient follow-up appointments and blood pressure control among patients with hypertension. *BMC Cardiovascular Disorders*, 20(1), pp.1-11.

#### **D) Clinician-patient discord: Exploring differences in perspectives for discontinuing clopidogrel**

By: Garavalia, Linda; Ho, P. Michael; Garavalia, Brian; et al.

Cited by (14):

THIS IS: Garavalia L, Ho PM, Garavalia B, Foody JM, Kruse H, Spertus JA, Decker C. Clinician-patient discord: exploring differences in perspectives for discontinuing clopidogrel. *Eur J Cardiovasc Nurs*. 2011 Mar;10(1):50-5. doi: 10.1016/j.ejcnurse.2010.04.002. Epub 2010 May 21. PMID: 20483665; PMCID: PMC2932847.

Boyd AD, Ndukwe CI, Dileep A, Everin OF, Yao Y, Welland B, Field J, Baumann M, Flores JD Jr, Shroff A, Groo V, Dickens C, Doukky R, Francis R, Peacock G, Wilkie DJ. Elderly Medication Adherence Intervention Using the My Interventional Drug-Eluting Stent Educational App: Multisite Randomized Feasibility Trial. *JMIR Mhealth Uhealth*. 2020 Jun 24;8(6):e15900. doi: 10.2196/15900. PMID: 32579120; PMCID: PMC7381043.

Freier C, Heintze C, Herrmann WJ. Prescribing and medical non-adherence after myocardial infarction: qualitative interviews with general practitioners in Germany. *BMC Fam Pract*. 2020 May 8;21(1):81. doi: 10.1186/s12875-020-01145-6. PMID: 32384915; PMCID: PMC7210678.

El-Toukhy H, Omar A, Abou Samra M. Effect of acute coronary syndrome patients' education on adherence to dual antiplatelet therapy. *J Saudi Heart Assoc*. 2017 Oct;29(4):252-258. doi: 10.1016/j.jsha.2017.02.003. Epub 2017 Mar 8. PMID: 28983168; PMCID: PMC5623036.

Biscaglia S, Tonet E, Pavasini R, Serenelli M, Bugani G, Cimaglia P, Gallo F, Spitaleri G, Del Franco A, Aquila G, Vieceli Dalla Sega F, Tebaldi M, Tumscitz C, Ferrari R, Campo G. A counseling program on nuisance bleeding improves quality of life in patients on dual antiplatelet therapy: A randomized controlled trial. *PLoS One*. 2017 Aug 23;12(8):e0182124. doi: 10.1371/journal.pone.0182124. PMID: 28832589; PMCID: PMC5568410.

Shah V, Dileep A, Dickens C, Groo V, Welland B, Field J, Baumann M, Flores JD, Shroff A, Zhao Z, Yao Y, Wilkie DJ, Boyd AD. Patient-Centered Tablet Application for Improving Medication Adherence after a Drug-Eluting Stent. *Front Public Health*. 2016 Dec 12;4:272. doi: 10.3389/fpubh.2016.00272. PMID: 28018897; PMCID: PMC5149519.

Reeve E, Low LF, Shakib S, Hilmer SN. Development and Validation of the Revised Patients' Attitudes Towards Deprescribing (rPATD) Questionnaire: Versions for Older Adults and Caregivers. *Drugs Aging*. 2016 Dec;33(12):913-928. doi: 10.1007/s40266-016-0410-1. PMID: 27785734.

Lambert-Kerzner A, Havranek EP, Plomondon ME, Fagan KM, McCreight MS, Fehling KB, Williams DJ, Hamilton AB, Albright K, Blatchford PJ, Mihalko-Corbitt R, Bryson CL, Bosworth HB, Kirshner MA, Giacco EJ, Ho PM. Perspectives of patients on factors relating to adherence to post-acute coronary syndrome medical regimens. *Patient Prefer Adherence*. 2015 Jul 24;9:1053-9. doi: 10.2147/PPA.S84546. PMID: 26244013; PMCID: PMC4521673.

Boyd AD, Moores K, Shah V, Sadhu E, Shroff A, Groo V, Dickens C, Field J, Baumann M, Welland B, Gutowski G, Flores JD Jr, Zhao Z, Bahroos N, Hynes DM, Wilkie DJ. My Interventional Drug-Eluting Stent Educational App (MyIDEA): Patient-Centered Design

Methodology. *JMIR Mhealth Uhealth*. 2015 Jul 2;3(3):e74. doi: 10.2196/mhealth.4021. PMID: 26139587; PMCID: PMC4526975.

Mathews R, Peterson ED, Honeycutt E, Chin CT, Efron MB, Zettler M, Fonarow GC, Henry TD, Wang TY. Early Medication Nonadherence After Acute Myocardial Infarction: Insights into Actionable Opportunities From the Treatment with ADP receptor inhibitorS: Longitudinal Assessment of Treatment Patterns and Events after Acute Coronary Syndrome (TRANSLATE-ACS) Study. *Circ Cardiovasc Qual Outcomes*. 2015 Jul;8(4):347-56. doi: 10.1161/CIRCOUTCOMES.114.001223. Epub 2015 Jun 2. PMID: 26038524; PMCID: PMC4512913.

Rashid MA, Edwards D, Walter FM, Mant J. Medication taking in coronary artery disease: a systematic review and qualitative synthesis. *Ann Fam Med*. 2014 May-Jun;12(3):224-32. doi: 10.1370/afm.1620. PMID: 24821893; PMCID: PMC4018370.

Czarny MJ, Nathan AS, Yeh RW, Mauri L. Adherence to dual antiplatelet therapy after coronary stenting: a systematic review. *Clin Cardiol*. 2014 Aug;37(8):505-13. doi: 10.1002/clc.22289. Epub 2014 May 2. PMID: 24797884; PMCID: PMC4140973.

Amin AP, Bachuwar A, Reid KJ, Chhatriwalla AK, Salisbury AC, Yeh RW, Kosiborod M, Wang TY, Alexander KP, Gosch K, Cohen DJ, Spertus JA, Bach RG. Nuisance bleeding with prolonged dual antiplatelet therapy after acute myocardial infarction and its impact on health status. *J Am Coll Cardiol*. 2013 May 28;61(21):2130-8. doi: 10.1016/j.jacc.2013.02.044. Epub 2013 Mar 26. PMID: 23541975; PMCID: PMC4332538.

Decker C, Garavalia L, Garavalia B, Simon T, Loeb M, Spertus JA, Daniel WC. Exploring barriers to optimal anticoagulation for atrial fibrillation: interviews with clinicians. *J Multidiscip Healthc*. 2012;5:129-35. doi: 10.2147/JMDH.S33045. Epub 2012 Jun 13. PMID: 22936848; PMCID: PMC3426274.

### **E) Exploring Patients' Reasons for Discontinuance of Heart Medications**

By: Garavalia, Linda; Garavalia, Brian; Spertus, John A.; et al.

Cited by (26):

THIS IS : Garavalia L, Garavalia B, Spertus JA, Decker C. Exploring patients' reasons for discontinuance of heart medications. *J Cardiovasc Nurs*. 2009 Sep-Oct;24(5):371-9. doi: 10.1097/JCN.0b013e3181ae7b2a. PMID: 19707097; PMCID: PMC3351271.

Herrett E, Williamson E, Brack K, Beaumont D, Perkins A, Thayne A, Shakur-Still H, Roberts I, Prowse D, Goldacre B, van Staa T, MacDonald TM, Armitage J, Wimborne J, Melrose P, Singh J, Brooks L, Moore M, Hoffman M, Smeeth L; StatinWISE Trial Group. Statin treatment and muscle symptoms: series of randomised, placebo controlled n-of-1 trials. *BMJ*. 2021 Feb 24;372:n135. doi: 10.1136/bmj.n135. PMID: 33627334; PMCID: PMC7903384.

Mahmood S, Jalal Z, Hadi MA, Khan TM, Haque MS, Shah KU. Prevalence of non-adherence to antihypertensive medication in Asia: a systematic review and meta-analysis. *Int J Clin Pharm*. 2021 Jan 29. doi: 10.1007/s11096-021-01236-z. Epub ahead of print. PMID: 33515135.

Boyd AD, Ndukwe CI, Dileep A, Everin OF, Yao Y, Welland B, Field J, Baumann M, Flores JD Jr, Shroff A, Groo V, Dickens C, Doukky R, Francis R, Peacock G, Wilkie DJ. Elderly Medication Adherence Intervention Using the My Interventional Drug-Eluting Stent Educational App: Multisite Randomized Feasibility Trial. *JMIR Mhealth Uhealth*. 2020 Jun 24;8(6):e15900. doi: 10.2196/15900. PMID: 32579120; PMCID: PMC7381043.

Lam SKK, Kwong EWY, Hung MSY, Chien WT. Emergency nurses' perceptions regarding the risks appraisal of the threat of the emerging infectious disease situation in emergency departments. *Int J Qual Stud Health Well-being*. 2020 Dec;15(1):e1718468. doi: 10.1080/17482631.2020.1718468. PMID: 31975652; PMCID: PMC7034460.

Wang Y, Nichol MB, Yan BP, Wu J, Tomlinson B, Lee VW. Descriptive analysis of real-world medication use pattern of statins and antiplatelet agents among patients with acute coronary syndrome in Hong Kong and the USA. *BMJ Open*. 2019 Jul 16;9(7):e024937. doi: 10.1136/bmjopen-2018-024937. PMID: 31315855; PMCID: PMC6661883.

M A Jalal ZS, Smith F, Taylor D, Finlay K, Patel H, Antoniou S. Impact of pharmacy care upon adherence to cardiovascular medicines: a feasibility pilot controlled trial. *Eur J Hosp Pharm*. 2016 Sep;23(5):250-256. doi: 10.1136/ejhpharm-2015-000790. Epub 2016 Feb 2. PMID: 31156861; PMCID: PMC6451569.

Chhatriwalla AK, Decker C, Gialde E, Catley D, Goggin K, Jaschke K, Jones P, deBronkart D, Sun T, Spertus JA. Developing and Testing a Personalized, Evidence-Based, Shared Decision-Making Tool for Stent Selection in Percutaneous Coronary Intervention Using a Pre-Post Study Design. *Circ Cardiovasc Qual Outcomes*. 2019 Feb;12(2):e005139. doi: 10.1161/CIRCOUTCOMES.118.005139. PMID: 30764654; PMCID: PMC6383794.

Jalal Z, Antoniou S, Taylor D, Paudyal V, Finlay K, Smith F. South Asians living in the UK and adherence to coronary heart disease medication: a mixed- method study. *Int J Clin Pharm*. 2019 Feb;41(1):122-130. doi: 10.1007/s11096-018-0760-3. Epub 2018 Dec 18. PMID: 30564971; PMCID: PMC6394505.

Koh JJK, Cheng RX, Yap Y, Haldane V, Tan YG, Teo KWQ, Srivastava A, Ong PS, Perel P, Legido-Quigley H. Access and adherence to medications for the primary and secondary prevention of atherosclerotic cardiovascular disease in Singapore: a qualitative study. *Patient Prefer Adherence*. 2018 Nov 22;12:2481-2498. doi: 10.2147/PPA.S176256. PMID: 30538432; PMCID: PMC6255116.

Krack G, Holle R, Kirchberger I, Kuch B, Amann U, Seidl H. Determinants of adherence and effects on health-related quality of life after myocardial infarction: a prospective cohort study. *BMC Geriatr*. 2018 Jun 7;18(1):136. doi: 10.1186/s12877-018-0827-y. PMID: 29898677; PMCID: PMC6001009.

Ju A, Hanson CS, Banks E, Korda R, Craig JC, Usherwood T, MacDonald P, Tong A. Patient beliefs and attitudes to taking statins: systematic review of qualitative studies. *Br J Gen Pract*. 2018 Jun;68(671):e408-e419. doi: 10.3399/bjgp18X696365. PMID: 29784867; PMCID: PMC6002012.

Herrett E, Williamson E, Beaumont D, Prowse D, Youssouf N, Brack K, Armitage J, Goldacre B, MacDonald T, Staa TV, Roberts I, Shakur-Still H, Smeeth L. Study protocol for statin web-based investigation of side effects (StatinWISE): a series of randomised controlled N-of-1 trials

- comparing atorvastatin and placebo in UK primary care. *BMJ Open*. 2017 Dec 1;7(12):e016604. doi: 10.1136/bmjopen-2017-016604. PMID: 29197834; PMCID: PMC5719321.
- Shah V, Dileep A, Dickens C, Groo V, Welland B, Field J, Baumann M, Flores JD, Shroff A, Zhao Z, Yao Y, Wilkie DJ, Boyd AD. Patient-Centered Tablet Application for Improving Medication Adherence after a Drug-Eluting Stent. *Front Public Health*. 2016 Dec 12;4:272. doi: 10.3389/fpubh.2016.00272. PMID: 28018897; PMCID: PMC5149519.
- Halava H, Huupponen R, Pentti J, Kivimäki M, Vahtera J. Predictors of first-year statin medication discontinuation: A cohort study. *J Clin Lipidol*. 2016 Jul-Aug;10(4):987-995. doi: 10.1016/j.jacl.2016.04.010. Epub 2016 May 6. PMID: 27578131; PMCID: PMC5012887.
- Lambert-Kerzner A, Havranek EP, Plomondon ME, Fagan KM, McCreight MS, Fehling KB, Williams DJ, Hamilton AB, Albright K, Blatchford PJ, Mihalko-Corbitt R, Bryson CL, Bosworth HB, Kirshner MA, Giacco EJ, Ho PM. Perspectives of patients on factors relating to adherence to post-acute coronary syndrome medical regimens. *Patient Prefer Adherence*. 2015 Jul 24;9:1053-9. doi: 10.2147/PPA.S84546. PMID: 26244013; PMCID: PMC4521673.
- Granger BB, Ekman I, Hernandez AF, Sawyer T, Bowers MT, DeWald TA, Zhao Y, Levy J, Bosworth HB. Results of the Chronic Heart Failure Intervention to Improve MEDication Adherence study: A randomized intervention in high-risk patients. *Am Heart J*. 2015 Apr;169(4):539-48. doi: 10.1016/j.ahj.2015.01.006. Epub 2015 Jan 14. PMID: 25819861; PMCID: PMC5058442.
- Li JH, Joy SV, Haga SB, Orlando LA, Kraus WE, Ginsburg GS, Voora D. Genetically guided statin therapy on statin perceptions, adherence, and cholesterol lowering: a pilot implementation study in primary care patients. *J Pers Med*. 2014 Mar 27;4(2):147-62. doi: 10.3390/jpm4020147. PMID: 25563221; PMCID: PMC4263970.
- Duru OK, Edgington S, Mangione C, Turk N, Tseng CH, Kimbro L, Ettner S. Association of Medicare Part D low-income cost subsidy program enrollment with increased fill adherence to clopidogrel after coronary stent placement. *Pharmacotherapy*. 2014 Dec;34(12):1230-8. doi: 10.1002/phar.1502. Epub 2014 Oct 14. PMID: 25314343; PMCID: PMC4276510.
- Rashid MA, Edwards D, Walter FM, Mant J. Medication taking in coronary artery disease: a systematic review and qualitative synthesis. *Ann Fam Med*. 2014 May-Jun;12(3):224-32. doi: 10.1370/afm.1620. PMID: 24821893; PMCID: PMC4018370.
- Palamaner Subash Shantha G, Ramos J, Thomas-Hemak L, Pancholy SB. Association of vitamin D and incident statin induced myalgia--a retrospective cohort study. *PLoS One*. 2014 Feb 19;9(2):e88877. doi: 10.1371/journal.pone.0088877. PMID: 24586424; PMCID: PMC3929495.
- Zhang H, Plutzky J, Skentzos S, Morrison F, Mar P, Shubina M, Turchin A. Discontinuation of statins in routine care settings: a cohort study. *Ann Intern Med*. 2013 Apr 2;158(7):526-34. doi: 10.7326/0003-4819-158-7-201304020-00004. PMID: 23546564; PMCID: PMC3692286.
- Efstathiou G, Papastavrou E, Raftopoulos V, Merkouris A. Factors influencing nurses' compliance with Standard Precautions in order to avoid occupational exposure to microorganisms: A focus group study. *BMC Nurs*. 2011 Jan 21;10:1. doi: 10.1186/1472-6955-10-1. PMID: 21255419; PMCID: PMC3033845.

Garavalia L, Garavalia B, Spertus JA, Decker C. Medication Discussion Questions (MedDQ): developing a guide to facilitate patient-clinician communication about heart medications. *J Cardiovasc Nurs*. 2011 Jul-Aug;26(4):E12-9. doi: 10.1097/JCN.0b013e3181efea94. PMID: 21099699; PMCID: PMC3114190.

McHorney CA, Spain CV. Frequency of and reasons for medication non-fulfillment and non-persistence among American adults with chronic disease in 2008. *Health Expect*. 2011 Sep;14(3):307-20. doi: 10.1111/j.1369-7625.2010.00619.x. Epub 2010 Sep 23. PMID: 20860775; PMCID: PMC5060587.

### **F) Drug compliance after stroke and myocardial infarction: A comparative study**

By: Arif, Hiba; Aijaz, Bilal; Islam, Muhammad; et al.

Cited by (4):

Barrett LA, Payrovnaziri SN, Bian J, He Z. Building Computational Models to Predict One-Year Mortality in ICU Patients with Acute Myocardial Infarction and Post Myocardial Infarction Syndrome. *AMIA Jt Summits Transl Sci Proc*. 2019 May 6;2019:407-416. PMID: 31258994; PMCID: PMC6568079.

Kamal AK, Khalid W, Muqteet A, Jamil A, Farhat K, Gillani SRA, Zulfiqar M, Saif M, Muhammad AA, Zaidi F, Mustafa M, Gowani A, Sharif S, Bokhari SS, Tai J, Rahman N, Sultan FAT, Sayani S, Virani SS. Making prescriptions "talk" to stroke and heart attack survivors to improve adherence: Results of a randomized clinical trial (The Talking Rx Study). *PLoS One*. 2018 Dec 20;13(12):e0197671. doi: 10.1371/journal.pone.0197671. PMID: 30571697; PMCID: PMC6301764.

Al AlShaikh S, Quinn T, Dunn W, Walters M, Dawson J. Predictive factors of non-adherence to secondary preventative medication after stroke or transient ischaemic attack: A systematic review and meta-analyses. *Eur Stroke J*. 2016 Jun;1(2):65-75. doi: 10.1177/2396987316647187. Epub 2016 May 5. PMID: 29900404; PMCID: PMC5992740.

Kamal AK, Shaikh Q, Pasha O, Azam I, Islam M, Memon AA, Rehman H, Akram MA, Affan M, Nazir S, Aziz S, Jan M, Andani A, Muqteet A, Ahmed B, Khoja S. A randomized controlled behavioral intervention trial to improve medication adherence in adult stroke patients with prescription tailored Short Messaging Service (SMS)-SMS4Stroke study. *BMC Neurol*. 2015 Oct 21;15:212. doi: 10.1186/s12883-015-0471-5. PMID: 26486857; PMCID: PMC4618367.

### **G) Impact of community pharmacist intervention discussing patients' beliefs to improve medication adherence**

G Gujral, K Winckel, LM Nissen, WN Cottrell

Cited by (9):

Mu X, Yin C, He X, Li H, Gong Y, Wei W, Zhang Y, Tang F. Correlation Between Patients' Medication Adherence and Their Psychological Contract with Hospital Pharmacists. *Patient*

Prefer Adherence. 2020 Sep 4;14:1605-1613. doi: 10.2147/PPA.S264026. PMID: 32943852; PMCID: PMC7478916.

Cross AJ, Elliott RA, Petrie K, Kuruvilla L, George J. Interventions for improving medication-taking ability and adherence in older adults prescribed multiple medications. *Cochrane Database Syst Rev.* 2020 May 8;5(5):CD012419. doi: 10.1002/14651858.CD012419.pub2. PMID: 32383493; PMCID: PMC7207012.

Oñatibia-Astibia A, Malet-Larrea A, Larrañaga B, Gastelurrutia MÁ, Calvo B, Ramírez D, Cantero I, Garay Á, Goyenechea E. Tailored interventions by community pharmacists and general practitioners improve adherence to statins in a Spanish randomized controlled trial. *Health Serv Res.* 2019 Jun;54(3):658-668. doi: 10.1111/1475-6773.13152. Epub 2019 Apr 7. PMID: 30957240; PMCID: PMC6505412.

Crawshaw J, Auyeung V, Ashworth L, Norton S, Weinman J. Healthcare provider-led interventions to support medication adherence following ACS: a meta-analysis. *Open Heart.* 2017 Dec 22;4(2):e000685. doi: 10.1136/openhrt-2017-000685. PMID: 29344366; PMCID: PMC5761293.

van Driel ML, Morledge MD, Ulep R, Shaffer JP, Davies P, Deichmann R. Interventions to improve adherence to lipid-lowering medication. *Cochrane Database Syst Rev.* 2016 Dec 21;12(12):CD004371. doi: 10.1002/14651858.CD004371.pub4. PMID: 28000212; PMCID: PMC6464006.

Johnston N, Weinman J, Ashworth L, Smethurst P, El Khoury J, Moloney C. Systematic reviews: causes of non-adherence to P2Y12 inhibitors in acute coronary syndromes and response to intervention. *Open Heart.* 2016 Oct 19;3(2):e000479. doi: 10.1136/openhrt-2016-000479. PMID: 27843565; PMCID: PMC5073512.

Akinbosoye OE, Taitel MS, Grana J, Hill J, Wade RL. Improving Medication Adherence and Health Care Outcomes in a Commercial Population through a Community Pharmacy. *Popul Health Manag.* 2016 Dec;19(6):454-461. doi: 10.1089/pop.2015.0176. Epub 2016 Apr 1. PMID: 27035728; PMCID: PMC5296931.

Nazar H, Nazar Z, Portlock J, Todd A, Slight SP. A systematic review of the role of community pharmacies in improving the transition from secondary to primary care. *Br J Clin Pharmacol.* 2015 Nov;80(5):936-48. doi: 10.1111/bcp.12718. Epub 2015 Oct 3. PMID: 26149372; PMCID: PMC4631167.

McKenzie SJ, McLaughlin D, Clark J, Doi SA. The burden of non-adherence to cardiovascular medications among the aging population in Australia: a meta-analysis. *Drugs Aging.* 2015 Mar;32(3):217-25. doi: 10.1007/s40266-015-0245-1. PMID: 25749743.

#### **H) Identifying determinants of medication adherence following myocardial infarction using the Theoretical Domains Framework and the Health Action Process Approach.**

Presseau, Justin; Schwalm, J. D; Grimshaw, Jeremy M; Witteman, Holly O; Natarajan, Madhu K; Linklater, Stefanie; Sullivan, Katrina; Ivers, Noah M.



Cited by {15):

Tesfaye WH, Erku D, Mekonnen A, Tefera YG, Castelino R, Sud K, Thomas J, Obamiro K. Medication non-adherence in chronic kidney disease: a mixed-methods review and synthesis using the theoretical domains framework and the behavioural change wheel. *J Nephrol*. 2021 Feb 9. doi: 10.1007/s40620-020-00895-x. Epub ahead of print. PMID: 33559850.

Xu HY, Yu YJ, Zhang QH, Hu HY, Li M. Tailored Interventions to Improve Medication Adherence for Cardiovascular Diseases. *Front Pharmacol*. 2020 Nov 13;11:510339. doi: 10.3389/fphar.2020.510339. PMID: 33364935; PMCID: PMC7751638.

Schwalm JD, Ivers NM, Bouck Z, Taljaard M, Natarajan MK, Dolovich L, Thavorn K, McCready T, O'Brien E, Grimshaw JM. Length of Initial Prescription at Hospital Discharge and Long-Term Medication Adherence for Elderly, Post-Myocardial Infarction Patients: Protocol for an Interrupted Time Series Study. *JMIR Res Protoc*. 2020 Nov 4;9(11):e18981. doi: 10.2196/18981. PMID: 33146624; PMCID: PMC7673978.

Vesnaver E, Goldman M, O'Brien S, MacPherson P, Butler-Foster T, Lapierre D, Otis J, Devine DV, Germain M, Rosser A, MacDonagh R, Randall T, Osbourne-Sorrell W, Clement-Thorne B, Al-Bakri TB, Rubini KA, Hill NE, Pousseau J. Barriers and enablers to source plasma donation by gay, bisexual and other men who have sex with men under revised eligibility criteria: protocol for a multiple stakeholder feasibility study. *Health Res Policy Syst*. 2020 Nov 2;18(1):131. doi: 10.1186/s12961-020-00643-4. PMID: 33138828; PMCID: PMC7605323.

Seguin ML, Rangnekar A, Renedo A, Palafox B, McKee M, Balabanova D. Systematic review of frameworks used to conceptualise health pathways of individuals diagnosed with cardiovascular diseases. *BMJ Glob Health*. 2020 Sep;5(9):e002464. doi: 10.1136/bmjgh-2020-002464. PMID: 32928800; PMCID: PMC7490945.

Desveaux L, Saragosa M, Russell K, McCleary N, Pousseau J, Witteman HO, Schwalm JD, Ivers NM. How and why a multifaceted intervention to improve adherence post-MI worked for some (and could work better for others): an outcome-driven qualitative process evaluation. *BMJ Open*. 2020 Sep 3;10(9):e036750. doi: 10.1136/bmjopen-2019-036750. PMID: 32883724; PMCID: PMC7473621.

Sud A, Armas A, Cunningham H, Tracy S, Foat K, Persaud N, Hosseiny F, Hyland S, Lowe L, Zlahtic E, Murti R, Derue H, Birnbaum I, Bonin K, Upshur R, Nelson MLA. Multidisciplinary care for opioid dose reduction in patients with chronic non-cancer pain: A systematic realist review. *PLoS One*. 2020 Jul 27;15(7):e0236419. doi: 10.1371/journal.pone.0236419. PMID: 32716982; PMCID: PMC7384622.

Ivers NM, Schwalm JD, Bouck Z, McCready T, Taljaard M, Grace SL, Cunningham J, Bosiak B, Pousseau J, Witteman HO, Suskin N, Wijeyesundera HC, Atzema C, Bhatia RS, Natarajan M, Grimshaw JM. Interventions supporting long term adherence and decreasing cardiovascular events after myocardial infarction (ISLAND): pragmatic randomised controlled trial. *BMJ*. 2020 Jun 10;369:m1731. doi: 10.1136/bmj.m1731. PMID: 32522811; PMCID: PMC7284284.

Freier C, Heintze C, Herrmann WJ. Prescribing and medical non-adherence after myocardial infarction: qualitative interviews with general practitioners in Germany. *BMC Fam Pract*. 2020 May 8;21(1):81. doi: 10.1186/s12875-020-01145-6. PMID: 32384915; PMCID: PMC7210678.

Crawshaw J, Presseau J, van Allen Z, Pinheiro Carvalho L, Jordison K, English S, Fergusson DA, Lauzier F, Turgeon AF, Sarti AJ, Martin C, D'Aragon F, Li AH, Knoll G, Ball I, Brehaut J, Burns KEA, Fortin MC, Weiss M, Meade M, Marsolais P, Shemie S, Zaabat S, Dhanani S, Kitto SC, Chassé M; Canadian Donation and Transplantation Research Program and the Canadian Critical Care Trials Group. Exploring the experiences and perspectives of substitute decision-makers involved in decisions about deceased organ donation: a qualitative study protocol. *BMJ Open*. 2019 Dec 23;9(12):e034594. doi: 10.1136/bmjopen-2019-034594. PMID: 31874899; PMCID: PMC7008441.

Araújo-Soares V, Hankonen N, Presseau J, Rodrigues A, Sniehotta FF. Developing Behavior Change Interventions for Self-Management in Chronic Illness: An Integrative Overview. *Eur Psychol*. 2019;24(1):7-25. doi: 10.1027/1016-9040/a000330. Epub 2018 Aug 16. PMID: 31496632; PMCID: PMC6727632.

Arden MA, Drabble S, O'Cathain A, Hutchings M, Wildman M. Adherence to medication in adults with Cystic Fibrosis: An investigation using objective adherence data and the Theoretical Domains Framework. *Br J Health Psychol*. 2019 May;24(2):357-380. doi: 10.1111/bjhp.12357. Epub 2019 Mar 1. PMID: 30825258; PMCID: PMC6519271.

Ehrler F, Gschwind L, Meyer P, Christian L, Blondon K. SMART-MEDS: Development of a Medication Adherence App for Acute Coronary Syndrome Patients based on a Gamified Behaviour Change Model. *AMIA Annu Symp Proc*. 2018 Dec 5;2018:413-421. PMID: 30815081; PMCID: PMC6371311.

Easthall C, Barnett N. Using Theory to Explore the Determinants of Medication Adherence; Moving Away from a One-Size-Fits-All Approach. *Pharmacy (Basel)*. 2017 Aug 30;5(3):50. doi: 10.3390/pharmacy5030050. PMID: 28970462; PMCID: PMC5622362.

Wittman HO, Presseau J, Nicholas Angl E, Jokhio I, Schwalm JD, Grimshaw JM, Bosiak B, Natarajan MK, Ivers NM. Negotiating Tensions Between Theory and Design in the Development of Mailings for People Recovering From Acute Coronary Syndrome. *JMIR Hum Factors*. 2017 Mar 1;4(1):e6. doi: 10.2196/humanfactors.6502. PMID: 28249831; PMCID: PMC5352859.

### **Systematic Searching Using 'Similar Articles' in PubMed**

**26/3/21**

#### **A) Perspectives of Patients and Professionals on Information and Education After Myocardial Infarction With Insight for Mixed Reality Implementation: Cross-Sectional Interview Study.**

By: Hilt, Alexander D; Mamaqi Kapllani, Kevin; Hierck, Beerend P; et al.

105 results

Attebring MF, Herlitz J, Ekman I. Intrusion and confusion--the impact of medication and health professionals after acute myocardial infarction. *Eur J Cardiovasc Nurs*. 2005 Jun;4(2):153-9. doi: 10.1016/j.ejcnurse.2005.02.001. Epub 2005 Mar 4. PMID: 15904886.

## Similar articles (182):

Hilt AD, Mamaqi Kapllani K, Hierck BP, Kemp AC, Albayrak A, Melles M, Schaliij MJ, Scherptong RWC. Perspectives of Patients and Professionals on Information and Education After Myocardial Infarction With Insight for Mixed Reality Implementation: Cross-Sectional Interview Study. *JMIR Hum Factors*. 2020 Jun 23;7(2):e17147. doi: 10.2196/17147. PMID: 32573464; PMCID: PMC7381062.

## Cited by (3):

Östbring MJ, Hellström L, Mårtensson J. Trivial or Troublesome: Experience with Coronary Heart Disease Medication from the Patient's Perspective. *Patient Prefer Adherence*. 2020 Feb 27;14:411-424. doi: 10.2147/PPA.S230120. PMID: 32184571; PMCID: PMC7053281.

## Similar articles (92):

Jalal Z, Antoniou S, Taylor D, Paudyal V, Finlay K, Smith F. South Asians living in the UK and adherence to coronary heart disease medication: a mixed- method study. *Int J Clin Pharm*. 2019 Feb;41(1):122-130. doi: 10.1007/s11096-018-0760-3. Epub 2018 Dec 18. PMID: 30564971; PMCID: PMC6394505.

## Cited by (1)

**B) "It's up to me with a little support" - Adherence after myocardial infarction: A qualitative study**

By: Hanna, Admi; Yael, Eilon-Moshe; Hadassa, Levy; et al.

124 results

Gujral G, Winckel K, Nissen LM, Cottrell WN. Impact of community pharmacist intervention discussing patients' beliefs to improve medication adherence. *Int J Clin Pharm*. 2014 Oct;36(5):1048-58. doi: 10.1007/s11096-014-9993-y. Epub 2014 Aug 19. PMID: 25135805.

Hilt AD, Mamaqi Kapllani K, Hierck BP, Kemp AC, Albayrak A, Melles M, Schaliij MJ, Scherptong RWC. Perspectives of Patients and Professionals on Information and Education After Myocardial Infarction With Insight for Mixed Reality Implementation: Cross-Sectional Interview Study. *JMIR Hum Factors*. 2020 Jun 23;7(2):e17147. doi: 10.2196/17147. PMID: 32573464; PMCID: PMC7381062.

**C) South Asians living in the UK and adherence to coronary heart disease medication: a mixed- method study**

By: Jalal, Zahraa; Antoniou, Sotiris; Taylor, David; et al.

127 results

Östbring MJ, Hellström L, Mårtensson J. Trivial or Troublesome: Experience with Coronary Heart Disease Medication from the Patient's Perspective. *Patient Prefer Adherence*. 2020 Feb 27;14:411-424. doi: 10.2147/PPA.S230120. PMID: 32184571; PMCID: PMC7053281.

#### **D) Clinician-patient discord: Exploring differences in perspectives for discontinuing clopidogrel**

By: Garavalia, Linda; Ho, P. Michael; Garavalia, Brian; et al.

83 results

Garavalia L, Garavalia B, Spertus JA, Decker C. Exploring patients' reasons for discontinuance of heart medications. *J Cardiovasc Nurs*. 2009 Sep-Oct;24(5):371-9. doi: 10.1097/JCN.0b013e3181ae7b2a. PMID: 19707097; PMCID: PMC3351271.

Decker C, Garavalia L, Garavalia B, Spertus JA. Clopidogrel-taking behavior by drug-eluting stent patients: Discontinuers versus continuers. *Patient Prefer Adherence*. 2008 Feb 2;2:167-75. doi: 10.2147/ppa.s3443. PMID: 19920959; PMCID: PMC2770390.

Similar articles (99):

Garavalia L, Ho PM, Garavalia B, Foody JM, Kruse H, Spertus JA, Decker C. Clinician-patient discord: exploring differences in perspectives for discontinuing clopidogrel. *Eur J Cardiovasc Nurs*. 2011 Mar;10(1):50-5. doi: 10.1016/j.ejcnurse.2010.04.002. Epub 2010 May 21. PMID: 20483665; PMCID: PMC2932847.

Garavalia L, Garavalia B, Spertus JA, Decker C. Exploring patients' reasons for discontinuance of heart medications. *J Cardiovasc Nurs*. 2009 Sep-Oct;24(5):371-9. doi: 10.1097/JCN.0b013e3181ae7b2a. PMID: 19707097; PMCID: PMC3351271.

Cited by (7)

#### **E) Exploring Patients' Reasons for Discontinuance of Heart Medications**

By: Garavalia, Linda; Garavalia, Brian; Spertus, John A.; et al.

76 results

Garavalia L, Ho PM, Garavalia B, Foody JM, Kruse H, Spertus JA, Decker C. Clinician-patient discord: exploring differences in perspectives for discontinuing clopidogrel. *Eur J Cardiovasc Nurs*. 2011 Mar;10(1):50-5. doi: 10.1016/j.ejcnurse.2010.04.002. Epub 2010 May 21. PMID: 20483665; PMCID: PMC2932847.

Decker C, Garavalia L, Garavalia B, Spertus JA. Clopidogrel-taking behavior by drug-eluting stent patients: Discontinuers versus continuers. *Patient Prefer Adherence*. 2008 Feb 2;2:167-75. doi: 10.2147/ppa.s3443. PMID: 19920959; PMCID: PMC2770390.

Presseau J, Schwalm JD, Grimshaw JM, Witteman HO, Natarajan MK, Linklater S, Sullivan K, Ivers NM. Identifying determinants of medication adherence following myocardial infarction using the Theoretical Domains Framework and the Health Action

Process Approach. Psychol Health. 2017 Oct;32(10):1176-1194. doi: 10.1080/08870446.2016.1260724. Epub 2016 Dec 20. PMID: 27997220.

**F) Drug compliance after stroke and myocardial infarction: A comparative study**

By: Arif, Hiba; Aijaz, Bilal; Islam, Muhammad; et al.

106 results- zero within criteria sift.

**G) Impact of community pharmacist intervention discussing patients' beliefs to improve medication adherence**

G Gujral, K Winckel, LM Nissen, WN Cottrell

321 results

Presseau J, Schwalm JD, Grimshaw JM, Witteman HO, Natarajan MK, Linklater S, Sullivan K, Ivers NM. Identifying determinants of medication adherence following myocardial infarction using the Theoretical Domains Framework and the Health Action Process Approach. Psychol Health. 2017 Oct;32(10):1176-1194. doi: 10.1080/08870446.2016.1260724. Epub 2016 Dec 20. PMID: 27997220.

Jalal Z, Antoniou S, Taylor D, Paudyal V, Finlay K, Smith F. South Asians living in the UK and adherence to coronary heart disease medication: a mixed- method study. Int J Clin Pharm. 2019 Feb;41(1):122-130. doi: 10.1007/s11096-018-0760-3. Epub 2018 Dec 18. PMID: 30564971; PMCID: PMC6394505.

Hanna A, Yael EM, Hadassa L, Iris E, Eugenia N, Lior G, Carmit S, Liora O. ``It's up to me with a little support" - Adherence after myocardial infarction: A qualitative study. Int J Nurs Stud. 2020 Jan;101:103416. doi: 10.1016/j.ijnurstu.2019.103416. Epub 2019 Sep 5. PMID: 31670171.

**H) Identifying determinants of medication adherence following myocardial infarction using the Theoretical Domains Framework and the Health Action Process Approach.**

Presseau, Justin; Schwalm, J. D; Grimshaw, Jeremy M; Witteman, Holly O; Natarajan, Madhu K; Linklater, Stefanie; Sullivan, Katrina; Ivers, Noah M.

129 results

Gujral G, Winckel K, Nissen LM, Cottrell WN. Impact of community pharmacist intervention discussing patients' beliefs to improve medication adherence. Int J Clin

Pharm. 2014 Oct;36(5):1048-58. doi: 10.1007/s11096-014-9993-y. Epub 2014 Aug 19. PMID: 25135805.

Garavalia L, Garavalia B, Spertus JA, Decker C. Exploring patients' reasons for discontinuance of heart medications. *J Cardiovasc Nurs.* 2009 Sep-Oct;24(5):371-9. doi: 10.1097/JCN.0b013e3181ae7b2a. PMID: 19707097; PMCID: PMC3351271.

Desveaux L, Saragosa M, Russell K, McCleary N, Presseau J, Witteman HO, Schwalm JD, Ivers NM. How and why a multifaceted intervention to improve adherence post-MI worked for some (and could work better for others): an outcome-driven qualitative process evaluation. *BMJ Open.* 2020 Sep 3;10(9):e036750. doi: 10.1136/bmjopen-2019-036750. PMID: 32883724; PMCID: PMC7473621.

Similar articles (67):

Presseau J, Schwalm JD, Grimshaw JM, Witteman HO, Natarajan MK, Linklater S, Sullivan K, Ivers NM. Identifying determinants of medication adherence following myocardial infarction using the Theoretical Domains Framework and the Health Action Process Approach. *Psychol Health.* 2017 Oct;32(10):1176-1194. doi: 10.1080/08870446.2016.1260724. Epub 2016 Dec 20. PMID: 27997220.

Cited by (0).

## Summary of Results

### Database search

| <b>Database Used</b>  | <b>No. Results Combined Concepts</b> | <b>No. Results Within Criteria</b> |
|-----------------------|--------------------------------------|------------------------------------|
| PubMed                | 52                                   | 5                                  |
| SCOPUS                | 101                                  | 7                                  |
| PsychINFO             | 12                                   | 2                                  |
| Cochrane Library      | 49                                   | 2                                  |
| Web Of Science        | 135                                  | 6                                  |
|                       |                                      |                                    |
| <b>Total</b>          | <b>349</b>                           | <b>22</b>                          |
| <b>Unique results</b> |                                      | <b>8</b>                           |

### Snowball results

| Search Type      | No. Of Results | No. results within Criteria | No. New results within criteria |
|------------------|----------------|-----------------------------|---------------------------------|
| Cited by         | 66             | 2                           | 1                               |
| Similar Articles | 1181           | 21                          | 4                               |
|                  |                |                             |                                 |

### Full-read Selection of results:

Hilt AD, Mamaqi Kapllani K, Hierck BP, Kemp AC, Albayrak A, Melles M, Schaliy MJ, Scherptong RWC. Perspectives of Patients and Professionals on Information and Education After Myocardial Infarction With Insight for Mixed Reality Implementation: Cross-Sectional Interview Study. *JMIR Hum Factors*. 2020 Jun 23;7(2):e17147. doi: 10.2196/17147. PMID: 32573464; PMCID: PMC7381062.

Hanna A, Yael EM, Hadassa L, Iris E, Eugenia N, Lior G, Carmit S, Liora O. "It's up to me with a little support" - Adherence after myocardial infarction: A qualitative study. *Int J Nurs Stud*. 2020 Jan;101:103416. doi: 10.1016/j.ijnurstu.2019.103416. Epub 2019 Sep 5. PMID: 31670171.

Jalal Z, Antoniou S, Taylor D, Paudyal V, Finlay K, Smith F. South Asians living in the UK and adherence to coronary heart disease medication: a mixed-method study. *Int J Clin Pharm*. 2019 Feb;41(1):122-130. doi: 10.1007/s11096-018-0760-3. Epub 2018 Dec 18. PMID: 30564971; PMCID: PMC6394505.

Garavalia L, Ho PM, Garavalia B, Foody JM, Kruse H, Spertus JA, Decker C. Clinician-patient discord: exploring differences in perspectives for discontinuing clopidogrel. *Eur J Cardiovasc Nurs*. 2011 Mar;10(1):50-5. doi: 10.1016/j.ejcnurse.2010.04.002. Epub 2010 May 21. PMID: 20483665; PMCID: PMC2932847.

Garavalia L, Garavalia B, Spertus JA, Decker C. Exploring patients' reasons for discontinuance of heart medications. *J Cardiovasc Nurs*. 2009 Sep-Oct;24(5):371-9. doi: 10.1097/JCN.0b013e3181ae7b2a. PMID: 19707097; PMCID: PMC3351271.

[Arif H, Aijaz B, Islam M, Aftab U, Kumar S, Shafqat S. Drug compliance after stroke and myocardial infarction: a comparative study. *Neurol India*. 2007 Apr-Jun;55(2):130-5. doi: 10.4103/0028-3886.32783. PMID: 17558116. \*\*Questionnaire\*\*]

[Gujral G, Winckel K, Nissen LM, Cottrell WN. Impact of community pharmacist intervention discussing patients' beliefs to improve medication adherence. *Int J Clin Pharm*. 2014 Oct;36(5):1048-58. doi: 10.1007/s11096-014-9993-y. Epub 2014 Aug 19. PMID: 25135805. \*\*Not separated diagnoses\*\*]

Presseau J, Schwalm JD, Grimshaw JM, Witteman HO, Natarajan MK, Linklater S, Sullivan K, Ivers NM. Identifying determinants of medication adherence following myocardial infarction using the Theoretical Domains Framework and the Health Action Process Approach. *Psychol Health*. 2017 Oct;32(10):1176-1194. doi: 10.1080/08870446.2016.1260724. Epub 2016 Dec 20. PMID: 27997220.

Attebring MF, Herlitz J, Ekman I. Intrusion and confusion--the impact of medication and health professionals after acute myocardial infarction. *Eur J Cardiovasc Nurs*. 2005 Jun;4(2):153-9. doi: 10.1016/j.ejcnurse.2005.02.001. Epub 2005 Mar 4. PMID: 15904886.

[Östbring MJ, Hellström L, Mårtensson J. Trivial or Troublesome: Experience with Coronary Heart Disease Medication from the Patient's Perspective. *Patient Prefer Adherence*. 2020 Feb 27;14:411-424. doi: 10.2147/PPA.S230120. PMID: 32184571; PMCID: PMC7053281. \*\*Not separated diagnoses\*\*]

Decker C, Garavalia L, Garavalia B, Spertus JA. Clopidogrel-taking behavior by drug-eluting stent patients: Discontinuers versus continuers. *Patient Prefer Adherence*. 2008 Feb 2;2:167-75. doi: 10.2147/ppa.s3443. PMID: 19920959; PMCID: PMC2770390.

Desveaux L, Saragosa M, Russell K, McCleary N, Presseau J, Witteman HO, Schwalm JD, Ivers NM. How and why a multifaceted intervention to improve adherence post-MI worked for some (and could work better for others): an outcome-driven qualitative process evaluation. *BMJ Open*. 2020 Sep 3;10(9):e036750. doi: 10.1136/bmjopen-2019-036750. PMID: 32883724; PMCID: PMC7473621.





**Supplement B: Characteristics of Included Studies**

| Authors                                                                                        | Year | Country of Origin | Aim                                                                                                                              | Design                    | Methodology                                                           | Sample size | Cohort detail                                                                                                                                                                                                                                                   | Main Findings                                                                                                                                                                                                                                                                   |
|------------------------------------------------------------------------------------------------|------|-------------------|----------------------------------------------------------------------------------------------------------------------------------|---------------------------|-----------------------------------------------------------------------|-------------|-----------------------------------------------------------------------------------------------------------------------------------------------------------------------------------------------------------------------------------------------------------------|---------------------------------------------------------------------------------------------------------------------------------------------------------------------------------------------------------------------------------------------------------------------------------|
| Attebring MF, Herlitz J, Ekman I.                                                              | 2005 | Sweden            | To explore patients' experiences of secondary prevention of MI                                                                   | In depth interview        | Hermeneutical analysis                                                | 20          | No previous CVD. 12 men, 8 women                                                                                                                                                                                                                                | Impact of medication- Bodily sensations perceived as due to medicines rather than disease. Impact of health professionals- Communication resulted in confusion about medication and severity of disease.                                                                        |
| Decker C, Garavalia L, Garavalia B, Spertus JA.                                                | 2008 | USA               | To investigate why patients stopped a medication and barriers to adherence                                                       | Qualitative interview     | Content analysis                                                      | 11          | NSTEMI patients with stent. Those who discontinued taking clopidogrel within one month of starting, compared to continuing patients. 41-77 years, mostly male and Caucasian.                                                                                    | Discontinuers cited a misunderstanding over treatment duration. Discontinuers also claimed weakness in system, such as gaps in transfer of care.                                                                                                                                |
| Desveaux L, Saragosa M, Russell K, McCleary N, Presseau J, Witteman HO, Schwalzm JD, Ivers NM. | 2020 | Canada            | Explore the extent, mechanism and future of a behavioural intervention to improve adherence to cardiac rehab and medicine taking | Semi-structured interview | Framework analysis, coding according to Theoretical Domains Framework | 31          | Post -AMI patients given a behavioural intervention booklet. Purposive sample to ensure variance of age, gender, SES, marital status and ethnicity. Separated into not engaged with intervention, engaged with positive outcome, engaged with negative outcome. | Patient's belief about consequences, belief about capability, intentions, social influence and emotions affected their adherence to treatment. The intervention helped patients adhere through reinforcement, behavioural regulation, providing knowledge and social influence. |
| Garavalia L, Garavalia B, Spertus JA, Decker C.                                                | 2009 | USA               | Explore reasons for stopping clopidogrel or cholesterol lowering medication in post-AMI patients                                 | Semi-structured interview | Framework analysis, coding according to Health Belief Model           | 11          | Post AMI patients, who either discontinued clopidogrel (45-77 years, 18% minority ethnic, 36% female), or cholesterol lowering medication n=29 (44-78 years, 19%                                                                                                | Cholesterol lowering medication mostly stopped due to side effects, treatment confusion, cost and mistrust of medicines. Clopidogrel stopped mostly due to duration confusion, side effects and cost.                                                                           |

|                                                                                                  |      |             |                                                                                                    |                                                                        |                                           |    |                                                                                                                                          |                                                                                                                                                                                                                                                                |
|--------------------------------------------------------------------------------------------------|------|-------------|----------------------------------------------------------------------------------------------------|------------------------------------------------------------------------|-------------------------------------------|----|------------------------------------------------------------------------------------------------------------------------------------------|----------------------------------------------------------------------------------------------------------------------------------------------------------------------------------------------------------------------------------------------------------------|
|                                                                                                  |      |             |                                                                                                    |                                                                        |                                           |    | minority ethnic, 56% female).                                                                                                            |                                                                                                                                                                                                                                                                |
| Garavalia L, Ho PM, Garavalia B, Foody JM, Kruse H, Spertus JA, Decker C.                        | 2011 | USA         | Describe patient and professional perspectives on why clopidogrel stopped after stent implantation | Semi-structured interview                                              | Content analysis                          | 22 | Patients with stent following MI, given clopidogrel. Comparison of discontinuers vs. continuers. 45-77 years, mostly male and Caucasian. | Patients perceived lack of knowledge of duration and purpose of clopidogrel treatment. Poor communication between clinicians and clinicians to patient, cost of clopidogrel and poor transfer of care between inpatient to outpatient were stated as barriers. |
| Hanna A, Yael EM, Hadassa L, Iris E, Eugenia N, Lior G, Carmit S, Liora O.                       | 2019 | Israel      | To gain patient perception of health-related adherence behaviours post-AMI                         | Semi-structured interview                                              | Content analysis                          | 22 | Patients recruited from a hospital rehab programme, or through community setting, a Jewish Kibbutz and Arab community (20 men, 2 women). | Adherence motivation was facilitated or impinged by inherent factors – willpower, competency and individual preferences. Extrinsic factors were found to be the threat of a recurrent AMI, family and significant others, and healthcare                       |
| Hilt AD, Mamaqi Kapllani K, Hierck BP, Kemp AC, Albayrak A, Melles M, Schaliy MJ, Scherptong RWC | 2020 | Netherlands | Understand how patients perceive information provided to them post AMI.                            | Semi-structured interview                                              | Content analysis, patient journey mapping | 12 | Patients (9 men, 3 women), and professionals n=6 (3 men, 3 women). Average patient age 62.7 years. STEMI n=10, NSTEMI n=2.               | Patients said information provided was too extensive. They perceived medication as a hurdle to recovery, mainly due to side effects, but coupled with an unclear benefit of medication. Their knowledge of anatomy was poor.                                   |
| Jalal Z, Antonio S, Taylor D, Paudyal V, Finlay K, Smith F                                       | 2019 | UK          | Investigate beliefs and experiences of CHD and medicine-taking behaviour in post-                  | Mixed methods - (Morisky scale, Belief About Medicines Questionnaire.) | Framework approach                        | 13 | South Asian patients attending a London heart attack centre (13 men, 1 woman). 32-72 years.                                              | Most patients perceived medication as important for their health. Half the patients could explain what their medications were for, half relied on family or professionals for this knowledge. Factors that influenced adherence were forgetfulness, family     |

|                                                                                                     |      |        |                                                                                                                                     |                                                                          |                                                             |    |                                                                                    |                                                                                                                                                                         |
|-----------------------------------------------------------------------------------------------------|------|--------|-------------------------------------------------------------------------------------------------------------------------------------|--------------------------------------------------------------------------|-------------------------------------------------------------|----|------------------------------------------------------------------------------------|-------------------------------------------------------------------------------------------------------------------------------------------------------------------------|
|                                                                                                     |      |        | AMI patients                                                                                                                        | semi-structured interview                                                |                                                             |    |                                                                                    | support, side effects, a healthcare practitioner, social deprivation and cardiac rehabilitation.                                                                        |
| Presseau J, Schwalzm JD, Grimshaw JM, Witteman HO, Natarajan MK, Linklater S, Sullivan K, Ivers NM. | 2017 | France | To compare the usefulness of varying behavioural theory based interventions for improving medication adherence in post-AMI patients | Semi structured interview<br><br>(Questionnaire based upon Likert scale) | Framework approach based upon Theoretical Domains Framework | 24 | Patients contacted at 0-2 weeks, 3-12 weeks, 13-24 weeks and 25-36 weeks post-AMI. | Key factors were beliefs about the consequences of taking medicines, memory, attention or decision processes, behavioural regulation, social role and role of identity. |

**Supplement C: Quality Assessment of Included Studies using COREQ standards**

Key: Present (+), Absent (-)

| Authors                                 | Interviewer | Credentials | Occupation | Gender | Experience | Relationship est. | Participant knowledge | Interviewer characteristic |
|-----------------------------------------|-------------|-------------|------------|--------|------------|-------------------|-----------------------|----------------------------|
| Attebring et al., (2005)                | -           | -           | -          | -      | -          | -                 | -                     | -                          |
| Decker et al., (2008)                   | -           | -           | -          | -      | -          | +                 | -                     | -                          |
| Desveaux et al., (2020)                 | -           | -           | -          | -      | -          | -                 | +                     | -                          |
| Garavalia L, Garavalia B et al., (2009) | -           | -           | -          | -      | -          | +                 | +                     | -                          |
| Garavalia L, Ho et al., (2011)          | -           | -           | -          | -      | -          | -                 | -                     | -                          |
| Hanna et al., (2019)                    | -           | -           | -          | -      | -          | +                 | +                     | -                          |
| Hilt et al., (2020)                     | -           | -           | -          | -      | -          | -                 | -                     | -                          |
| Jalal et al., (2019)                    | -           | -           | -          | -      | -          | +                 | +                     | -                          |
| Presseau et al., (2017)                 | -           | -           | -          | -      | -          | +                 | -                     | -                          |

| Authors                  | Methodological theory | Sampling | Method approach | Sample size | Non-participation | Setting | Presence of other | Description of sample |
|--------------------------|-----------------------|----------|-----------------|-------------|-------------------|---------|-------------------|-----------------------|
| Attebring et al., (2005) | +                     | +        | +               | +           | +                 | +       | -                 | +                     |
| Decker et al., (2008)    | +                     | +        | +               | +           | -                 | +       | -                 | +                     |
| Desveaux et al., (2020)  | +                     | +        | +               | +           | +                 | +       | -                 | +                     |

|                                         |   |   |   |   |   |   |   |   |
|-----------------------------------------|---|---|---|---|---|---|---|---|
| Garavalia L, Garavalia B et al., (2009) | + | + | + | + | + | + | - | + |
| Garavalia L, Ho et al., (2011)          | + | + | + | + | - | + | - | + |
| Hanna et al., (2019)                    | + | + | + | + | - | + | - | + |
| Hilt et al., (2020)                     | + | + | + | + | - | - | - | + |
| Jalal et al., (2019)                    | + | + | + | + | - | + | - | + |
| Presseau et al., (2017)                 | + | + | + | + | + | - | - | + |

| Authors                                 | Interview guide | Repeat interviews | A/V recording | Field notes | Duration | Data saturation | Transcript returned | No. coders |
|-----------------------------------------|-----------------|-------------------|---------------|-------------|----------|-----------------|---------------------|------------|
| Attebring et al., (2005)                | -               | -                 | +             | -           | +        | -               | -                   | +          |
| Decker et al., (2008)                   | +               | -                 | +             | -           | +        | +               | -                   | +          |
| Desveaux et al., (2020)                 | +               | -                 | +             | -           | -        | +               | -                   | +          |
| Garavalia L, Garavalia B et al., (2009) | +               | -                 | +             | -           | +        | +               | -                   | +          |
| Garavalia L, Ho et al., (2011)          | +               | -                 | +             | -           | +        | +               | -                   | +          |
| Hanna et al., (2019)                    | +               | -                 | +             | +           | +        | +               | -                   | +          |
| Hilt et al., (2020)                     | +               | -                 | -             | -           | -        | -               | -                   | -          |
| Jalal et al., (2019)                    | +               | -                 | +             | -           | +        | -               | -                   | +          |

|                         |   |   |   |   |   |   |   |   |
|-------------------------|---|---|---|---|---|---|---|---|
| Presseau et al., (2017) | + | - | - | - | - | + | - | - |
|-------------------------|---|---|---|---|---|---|---|---|

| Authors                                 | Coding tree | Derivation of themes | Software | Participant checking | Quotations | Data and findings match | Clarity major themes | Clarity minor themes |
|-----------------------------------------|-------------|----------------------|----------|----------------------|------------|-------------------------|----------------------|----------------------|
| Attebring et al., (2005)                | +           | +                    | -        | -                    | +          | +                       | +                    | +                    |
| Decker et al., (2008)                   | +           | +                    | +        | -                    | +          | +                       | +                    | +                    |
| Desveaux et al., (2020)                 | +           | +                    | -        | -                    | +          | +                       | +                    | +                    |
| Garavalia L, Garavalia B et al., (2009) | +           | +                    | -        | -                    | +          | +                       | +                    | +                    |
| Garavalia L, Ho et al., (2011)          | +           | +                    | +        | -                    | +          | +                       | +                    | +                    |
| Hanna et al., (2019)                    | +           | +                    | -        | -                    | +          | +                       | +                    | +                    |
| Hilt et al., (2020)                     | -           | -                    | -        | -                    | +          | +                       | +                    | -                    |
| Jalal et al., (2019)                    | +           | +                    | -        | -                    | +          | +                       | +                    | +                    |
| Presseau et al., (2017)                 | +           | +                    | -        | -                    | +          | +                       | +                    | -                    |

| Authors                  | Total + (ex. 32) |
|--------------------------|------------------|
| Attebring et al., (2005) | 16               |
| Decker et al., (2008)    | 19               |
| Desveaux et al., (2020)  | 18               |
| Garavalia L,             | 20               |

|                                |    |
|--------------------------------|----|
| Garavalia B et al., (2009)     |    |
| Garavalia L, Ho et al., (2011) | 18 |
| Hanna et al., (2019)           | 20 |
| Hilt et al., (2020)            | 9  |
| Jalal et al., (2019)           | 18 |
| Presseau et al., (2017)        | 14 |



**Supplement D: Themes Provided by Authors of Included Studies**

| Study Authors                           | Method of Analysis            | Themes Summarised                                  |
|-----------------------------------------|-------------------------------|----------------------------------------------------|
| Attebring et al., (2005)                | Hermeneutical Analysis        | Beliefs about consequences                         |
|                                         |                               | Memory/ Attention/ Decision processes              |
|                                         |                               | Behavioural regulation                             |
|                                         |                               | Social influence                                   |
|                                         |                               | Social/ Professional role and identity             |
| Decker et al., (2008)                   | Content Analysis              | Failure to recognise signs and symptoms of disease |
|                                         |                               | Seen as not serious                                |
|                                         |                               | Believe health is good                             |
|                                         |                               | Inaccurate perception                              |
|                                         |                               | Denial                                             |
|                                         |                               | Worsening condition                                |
|                                         |                               | Family history/ Fatalism                           |
|                                         |                               | Lack of continuity                                 |
|                                         |                               | Lack of / poor communication                       |
|                                         |                               | Inadequate patient education                       |
|                                         |                               | Self medicating                                    |
|                                         |                               | Mistrust                                           |
|                                         |                               | Side effects                                       |
|                                         |                               | Unhealthy lifestyle choices                        |
|                                         |                               | Economic burden                                    |
|                                         |                               | Lack of knowledge                                  |
|                                         |                               | Personal health feelings and beliefs               |
| Lack of effective communication         |                               |                                                    |
| Unaware of cardiac rehabilitation       |                               |                                                    |
| Lack of prompts from family and friends |                               |                                                    |
| Missed general cues                     |                               |                                                    |
| Desveaux et al., (2020)                 | Theoretical Domains Framework | Beliefs about capabilities                         |
|                                         |                               | Beliefs about consequences (positive outcomes)     |
|                                         |                               | Social influences (pre-existing beliefs)           |
|                                         |                               | Behavioural regulation                             |
|                                         |                               | Reinforcement                                      |
|                                         |                               | Knowledge                                          |
|                                         |                               | Social influence (having knowledge)                |

|                                         |                               |                                                                                     |
|-----------------------------------------|-------------------------------|-------------------------------------------------------------------------------------|
|                                         |                               | Beliefs about consequences (negative outcomes)                                      |
|                                         |                               | Emotion                                                                             |
|                                         |                               | Identity                                                                            |
|                                         |                               | Memory, attention, decision making                                                  |
| Garavalia L, Garavalia B et al., (2009) | Heath Belief Model            | Similarities: Cost<br>Side Effects<br>Distrust of Doctors<br>Prescription confusion |
|                                         |                               | Reduced sense of threat of disease with CLT, higher with clopidogrel                |
|                                         |                               | CLT knowledgeable yet discontinued                                                  |
|                                         |                               | Clopidogrel less knowledge                                                          |
|                                         |                               | Use of 'natural' lifestyle measures in CLT, none reported with clopidogrel          |
| Garavalia L, Ho et al., (2011)          | Content Analysis              | Lack of knowledge                                                                   |
|                                         |                               | Poor communication                                                                  |
| Hanna et al., (2019)                    | Content Analysis              | Willpower                                                                           |
|                                         |                               | A sense of competency                                                               |
|                                         |                               | Personal preferences                                                                |
|                                         |                               | Recurrent event                                                                     |
|                                         |                               | Family and relatives                                                                |
|                                         |                               | Healthcare providers                                                                |
| Hilt et al., (2020)                     | Content Analysis              | Medicine perceived as a barrier to recovery                                         |
| Jalal et al., (2019)                    | Content Analysis              | Necessity versus concerns                                                           |
|                                         |                               | Knowledge                                                                           |
|                                         |                               | Forgetfulness                                                                       |
|                                         |                               | Family support                                                                      |
|                                         |                               | Side effects                                                                        |
|                                         |                               | Relying of health practitioner                                                      |
|                                         |                               | Living in areas of deprivation                                                      |
|                                         |                               | Cardiac rehabilitation                                                              |
| Presseau et al., (2017)                 | Theoretical Domains Framework | Beliefs about consequences                                                          |
|                                         |                               | Memory / Attention / Decision processes                                             |
|                                         |                               | Behavioural regulation                                                              |
|                                         |                               | Social influence                                                                    |
|                                         |                               | Social / Professional role and identity                                             |
